# Supplementary material for: Thermosensitive molecularly imprinted polymers based on magnetic nanoparticles for the recognition of sulfamethazine
Source: Royal Society of Chemistry journal article supplement (doi:10.1039/c6ra16162f), 2016-01-01
Supplement: c6ra16162f1.pdf [file c6ra16162f1.pdf]

## Supporting Information

Thermosensitive molecularly imprinted polymers based on magnetic nanoparticles for  
the recognition of sulfamethazine

Weihong Huang,<sup>1</sup> Ping Xu,<sup>1</sup> Wenming Yang,<sup>2</sup> Wanzhen Xu\*<sup>1</sup>

<sup>1</sup>School of the Environment and Safety Engineering, Jiangsu University, Zhenjiang  
212013, China

<sup>2</sup>School of Materials Science and Engineering, Jiangsu University, Zhenjiang 212013,  
China

Corresponding Author

Tel.: +86 511 88791919; fax: +86 511 88791947.

E-mail : xwz09@ujs.edu.cn

Postal address: 301, Xuefu Road, Zhenjiang, Jiangsu Province, China

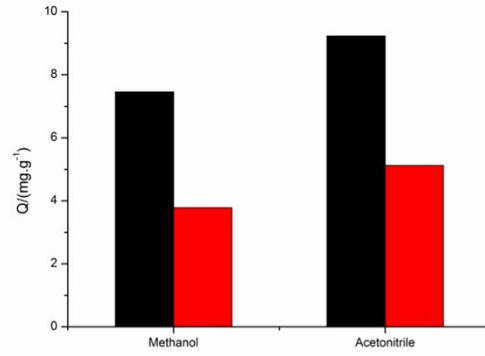

Fig.S1. Effect of solvent on the adsorption of 0.2mM SMZ onto 10 mg TMIPs in different solvents.

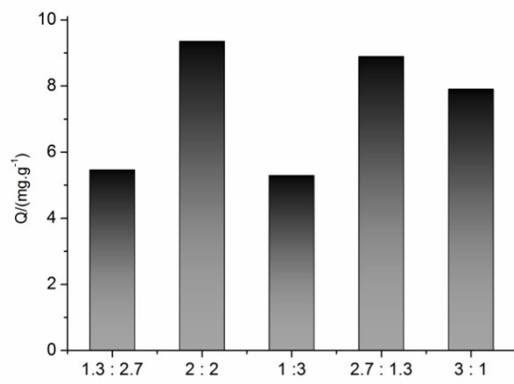

Fig.S2. The adsorptions of TMIPs differing in the proportion of the functional monomers

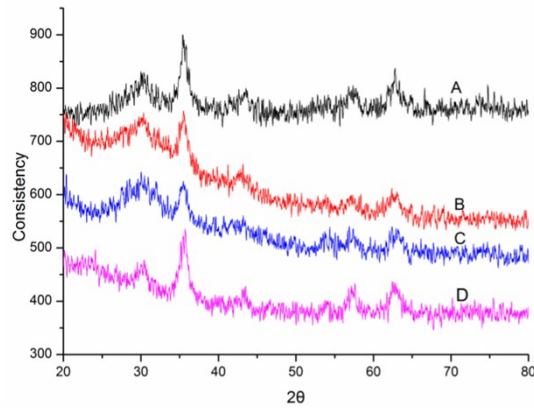

Fig.S3.XRD of Fe<sub>3</sub>O<sub>4</sub> (A), Fe<sub>3</sub>O<sub>4</sub>@SiO<sub>2</sub> (B), Fe<sub>3</sub>O<sub>4</sub>@MPS(C) and TMIPs(D)

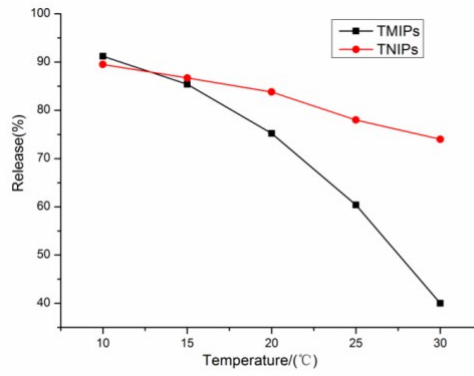

Fig.S4. The effect of the temperature on release percentage of TMIPs and TNIPs.

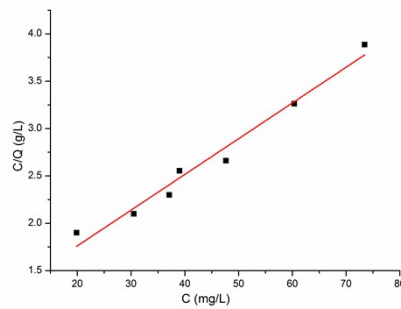

Fig.S5 Langmuir plot to estimate the binding mechanism of TMIPs towards SMZ.
